# Supplementary material for: A meta-analysis reveals the environmental and host factors shaping the structure and function of the shrimp microbiota
Source: PeerJ journal article supplement (doi:10.7717/peerj.5382), 2018-08-10

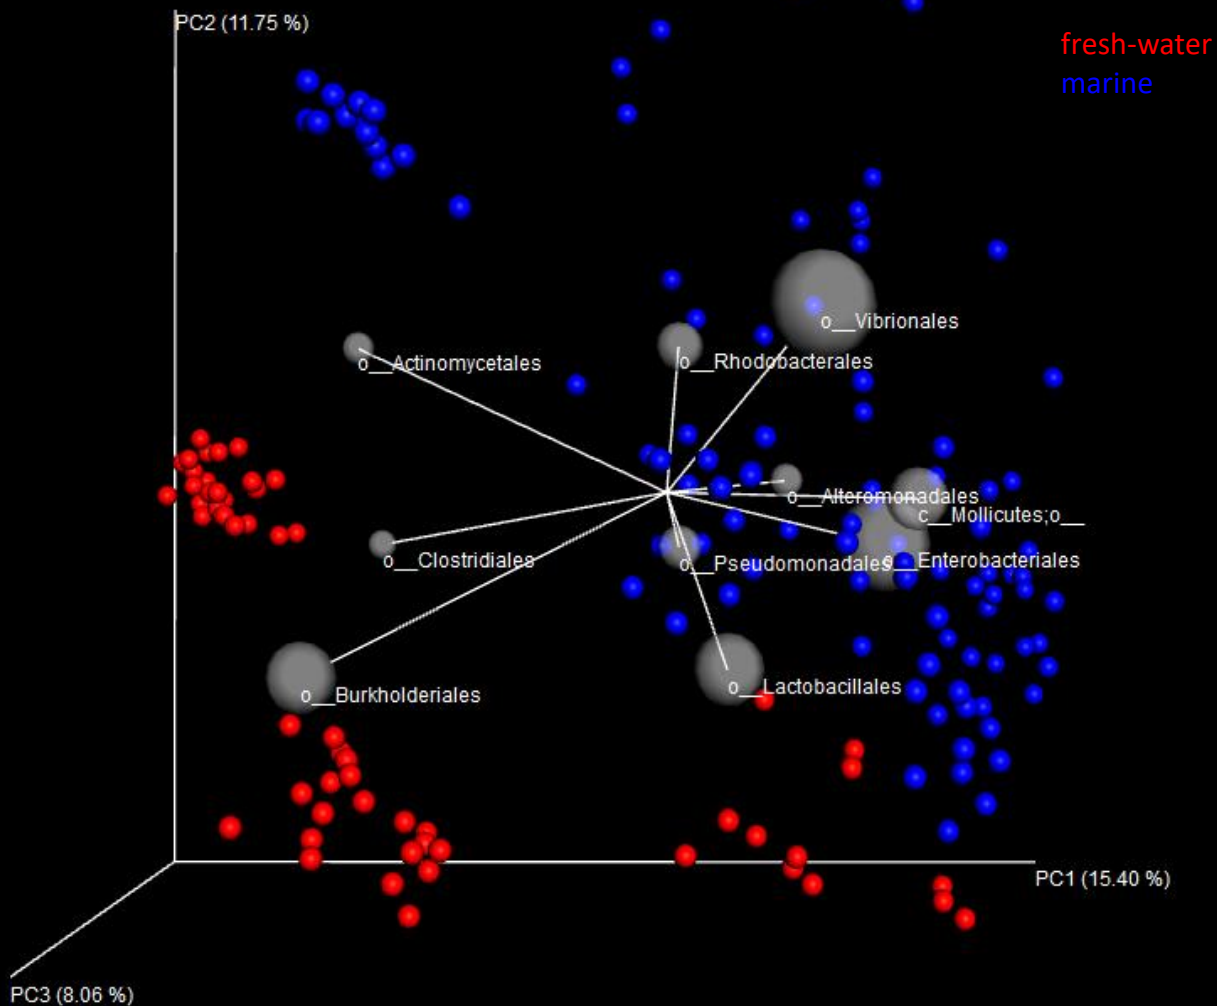

Supplement: FigS4.pdf [file FigS4.pdf]
