# Supplementary material for: A meta-analysis reveals the environmental and host factors shaping the structure and function of the shrimp microbiota
Source: PeerJ journal article supplement (doi:10.7717/peerj.5382), 2018-08-10
Supplement: TableS1.pdf [file TableS1.pdf]

**Table S1: Terms used for the systematic paper search in Scopus.**

|                                  |
|----------------------------------|
| shrimp microbiome                |
| shrimp microbiota                |
| vannamei microbiome              |
| vannamei microbiota              |
| prawn microbiome                 |
| prawn microbiota                 |
| bacterial community and shrimp   |
| bacterial community and prawn    |
| Bacterial biota and shrimp       |
| Bacterial biota and prawn        |
| bacterial communities and prawn  |
| bacterial communities and shrimp |
| microbial communities and shrimp |
| microbial communities and prawn  |
| microflora prawn                 |
| microflora shrimp                |
| bacterial biota and shrimp       |
| bacterial biota and prawn        |
| bacterial diversity and prawn    |

|                                       |
|---------------------------------------|
| bacterial diversity and shrimp        |
| bacterial population and shrimp       |
| bacterial population and prawn        |
| microbiotic shrimp                    |
| microbiotic prawn                     |
| metagenome shrimp                     |
| metagenomic shrimp                    |
| metagenome prawn                      |
| metagenomic prawn                     |
| next generation sequencing and shrimp |
| next generation sequencing and prawn  |
| bacterial composition and shrimp      |
| bacterial composition and prawn       |
| microbial composition and shrimp      |
| microbial composition and prawn       |
| bacterial composition and shrimp      |
| bacterial composition and prawn       |
