# Supplementary material for: A meta-analysis reveals the environmental and host factors shaping the structure and function of the shrimp microbiota
Source: PeerJ journal article supplement (doi:10.7717/peerj.5382), 2018-08-10
Supplement: TableS4.pdf [file TableS4.pdf]

**Table S4. Sample type with available sequenced data for marine and freshwater samples.** All data was collected from the original study for each sample.

|                      | <b>marine samples</b>                                           | <b>freshwater samples</b>                                                                  |
|----------------------|-----------------------------------------------------------------|--------------------------------------------------------------------------------------------|
| <b>habitats</b>      | wt, farm, laboratory                                            | wt, farm, laboratory                                                                       |
| <b>organs</b>        | intestine, clean intestine, gill, hepatopancreas, whole         | intestine, clean intestine, hepatopancreas, foregut                                        |
| <b>growth-stages</b> | adult, larvae, post-larvae, pre-adult                           | adult                                                                                      |
| <b>diets</b>         | wt, CHOs, soybean oil, beef tallow, linseed oil, fish oil, SBF  | wt                                                                                         |
| <b>species</b>       | <i>L. vannamei</i> , <i>P. monodon</i> , <i>A. longirostris</i> | <i>M. nipponense</i> , <i>M. rosenbergii</i> , <i>M. asperulum</i> , <i>N. Denticulata</i> |
| <b>health status</b> | healthy and diseased                                            | healthy                                                                                    |
